# Supplementary material
Source: Springer Nature journal article supplement (https://www.springermedizin.de/resource/supplementary/12974_2011_441_MOESM7_ESM.pdf/9601278)
Supplement: MOESM7 [file 9601278]

**A mRNA**

|  | TNF $\alpha$ LPS |              |     | TNF $\alpha$ LPS |              |     | TNF $\alpha$ LPS |              |
|--|------------------|--------------|-----|------------------|--------------|-----|------------------|--------------|
|  | IL-1 $\beta$     | +            |     | IL-1 $\beta$     | +            |     | IL-1 $\beta$     | +            |
|  | IFN $\gamma$     | IFN $\gamma$ | Con | IFN $\gamma$     | IFN $\gamma$ | Con | IFN $\gamma$     | IFN $\gamma$ |

sPLA2-IIA

G3PDH

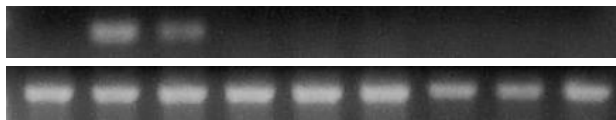

DITNC

BV-2

HAPI

**B Protein**

sPLA2-IIA

$\beta$ -actin

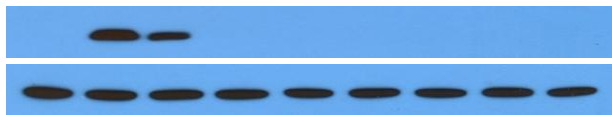

DITNC

BV-2

HAPI

**C Protein**

|  | 3 cyto | Con | 3 cyto | LPS IFN $\gamma$ | Con | 3 cyto | LPS IFN $\gamma$ | 3 cyto |
|--|--------|-----|--------|------------------|-----|--------|------------------|--------|
|--|--------|-----|--------|------------------|-----|--------|------------------|--------|

sPLA2-IIA

$\beta$ -actin

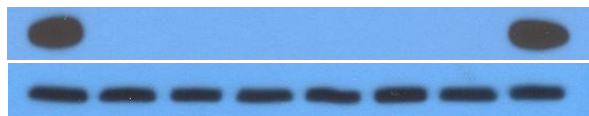

DITNC

Mouse primary  
microglia

Rat primary  
microglia

DITNC
